# Supplementary material for: Spliceosomal components protect embryonic neurons from R-loop-mediated DNA damage and apoptosis
Source: Oxford University Press journal article supplement (doi:10.1242/dmm.031583), 2018-02-01
Supplement: dmm031583supp.pdf [file dmm031583supp.pdf]

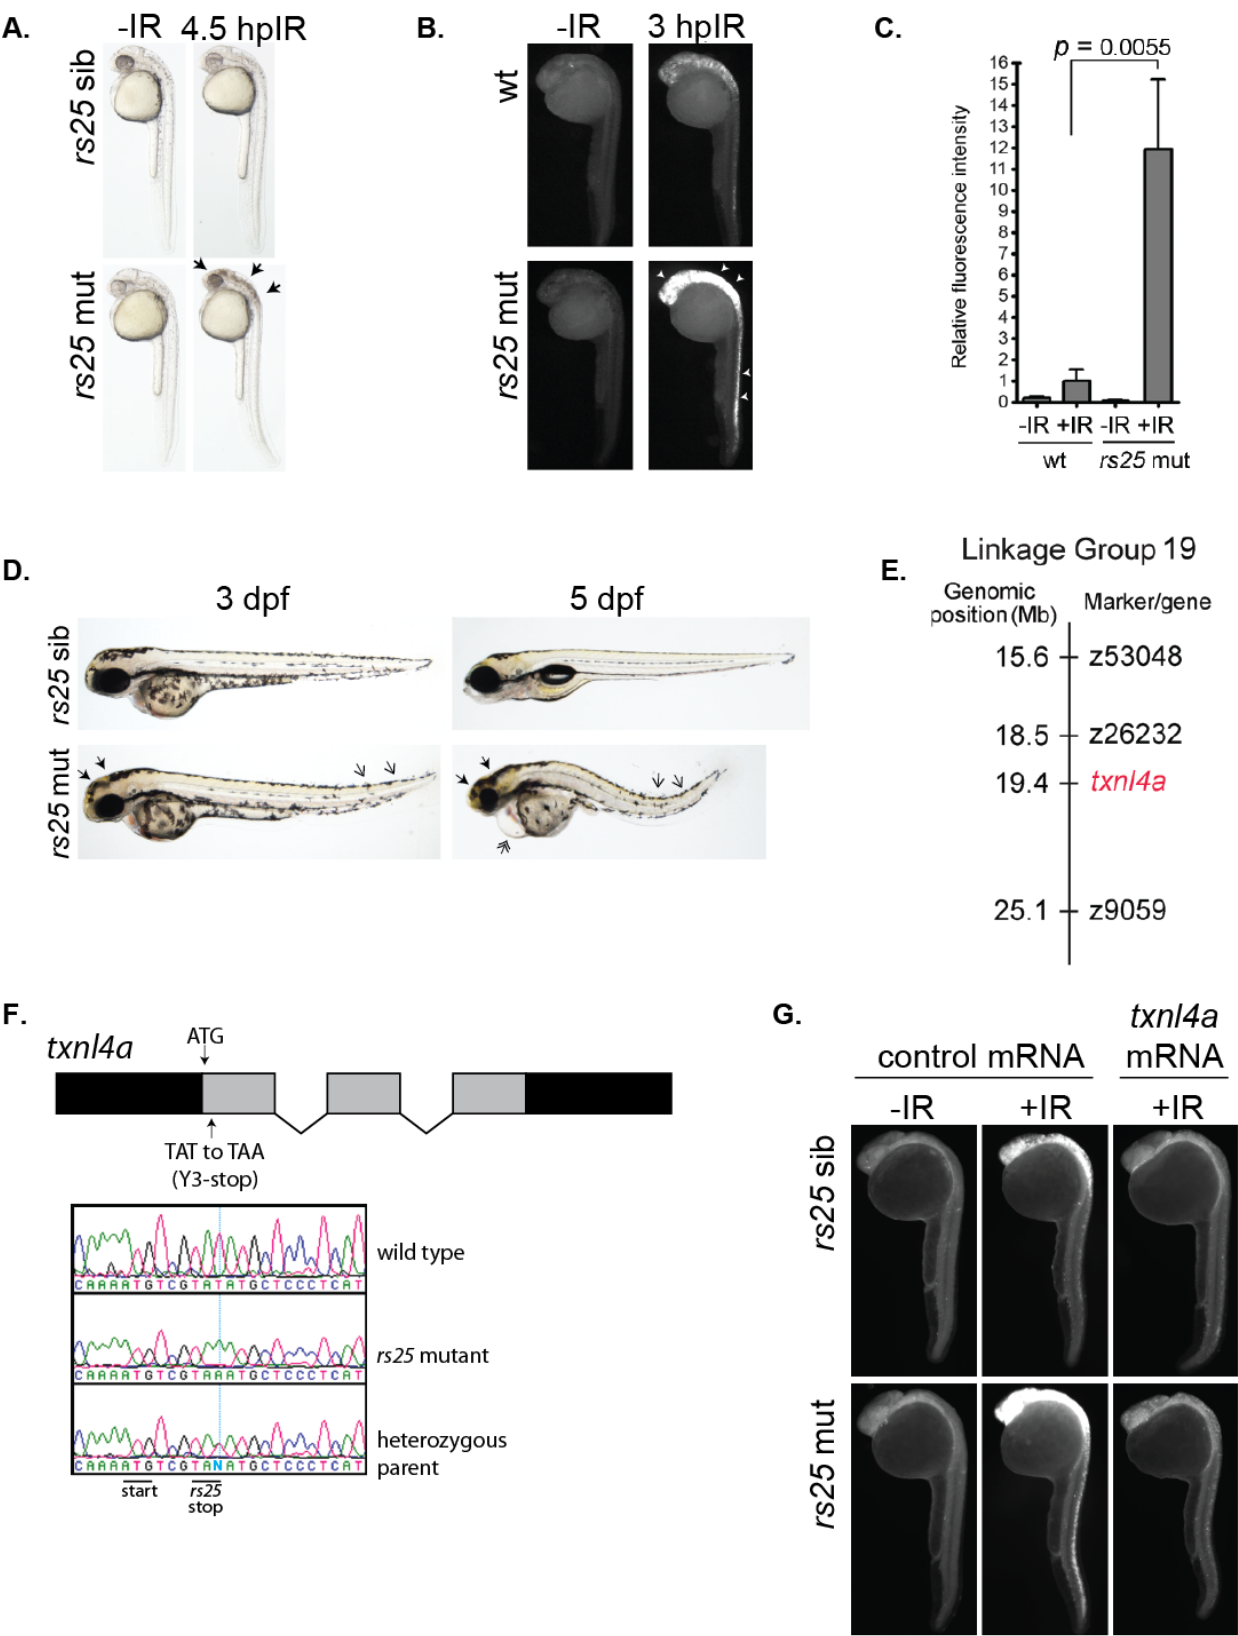

Figure S1

**Figure S1. The *rs25* mutation disrupts the *txn14a* gene**

**(A)** *rs25* siblings and mutants were exposed to 10 Gy IR and analyzed by bright field microscopy at 4.5 hpIR. Black arrows in the *rs25* mutants mark the accumulation of cell death. **(B-C)** Wild type embryos and *rs25* mutants were exposed to 10 Gy IR at 24 hpf, fixed at 3 hpIR, analyzed by active Caspase-3 and fluorescence was quantified. White arrowheads in the *rs25* mutants mark the accumulation of active Caspase-3-marked apoptosis. **(D)** *rs25* siblings and mutants were imaged by bright field microscopy at 3 and 5 dpf. Solid arrowheads in *rs25* mutants mark accumulation of cell death in the head. Single, open arrowheads mark the curved tail, and double arrowheads mark heart edema. **(E)** The *rs25* mutation was localized to linkage group 19 between flanking markers z26232 and z9059. **(F)** Sequencing of *rs25* mutants revealed a thymine to adenine transition within the *txn14a* coding sequence replacing the third amino acid (tyrosine) with a stop codon (Y3-Stop). Schematic of *txn14a* shows 3 exons (in grey boxes), the 5' and 3' untranslated region (in black boxes), and introns (bent lines). Sequencing of the *txn14a* gene is shown for wild type, *rs25* mutant, and an *rs25* heterozygote. A vertical blue line intersects the position of the mutated nucleotide. The solid, black lines under the sequencing designate the start of the coding sequence and *rs25*-mediated premature stop codon. **(G)** Embryos from an incross of *rs25* heterozygotes were injected with control mRNA (GFP) or *txn14a* mRNA. Embryos were exposed (or left unexposed) to 10 Gy at 24 hpf and analyzed 3 hours later for active Caspase-3.

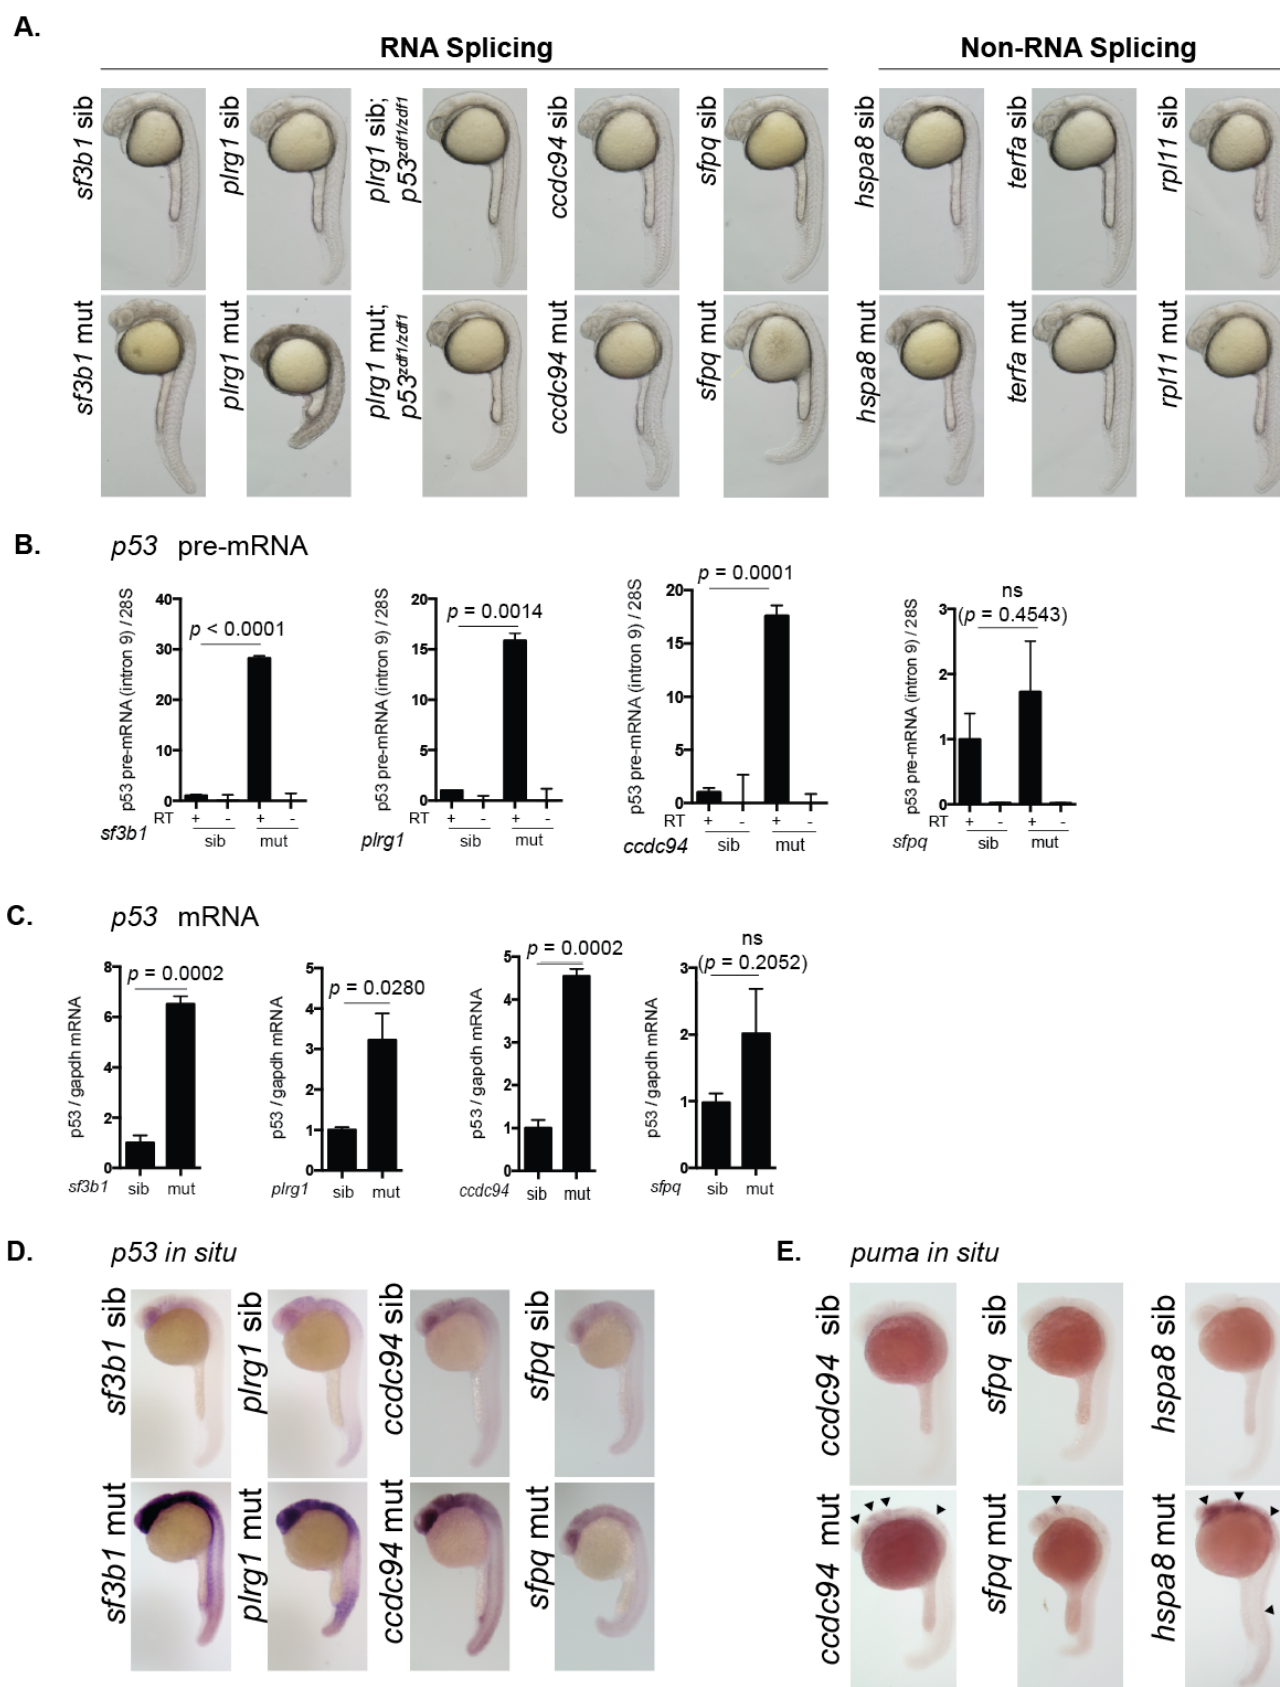

Figure S2

**Figure S2. Splicing-factor mutants have elevated levels of *tp53*.**

**(A)** Sibling and mutant embryos from *sf3b1*<sup>hi3394aTg</sup>, *plrg1*<sup>hi3174aTg</sup>, *plrg1*<sup>hi3174aTg</sup>;*p53*<sup>zdf1/zdf1</sup>, *ccdc94*<sup>zd1000</sup>, *sfpq*<sup>hi1779Tg</sup>, *hspa8*<sup>hi138Tg</sup>, *terfa*<sup>hi3678Tg</sup>, and *rpl11*<sup>hi3820bTg</sup> were imaged by bright-field microscopy at 25 hpf. Mutant phenotypes include neurodegeneration, curved tail, heart edema, and yolk extension defects. *terfa*<sup>hi3678Tg</sup> and *rpl11*<sup>hi3820bTg</sup> mutants are indistinguishable from siblings at this time point. **(B)** Splicing factor mutants and siblings were separated by phenotype. RNA was harvested from each group at 30 hpf, DNase treated, and reverse transcribed using random hexamer primers. Intron 9 of *tp53* was analyzed by qPCR to determine levels of *tp53* pre-mRNA. Minus reverse transcriptase (-RT) samples were included to control for genomic DNA contamination. *tp53* pre-mRNA levels were normalized to 28S RNA levels to yield a relative amount of RNA expression between groups. **(C)** RNA collected from embryos described in (B) was reverse transcribed using oligo-dT primers and analyzed by qPCR for *tp53* mRNA expression. *gapdh* mRNA levels were analyzed to determine relative amount of RNA expression per group. ns; not significantly different. **(D)** Splicing factor mutants and siblings were grown to 24 hpf and analyzed by whole mount *in situ* hybridization for *tp53* mRNA expression. **(E)** Sibling and mutant embryos from *ccdc94*<sup>zd1000</sup>, *sfpq*<sup>hi1779Tg</sup>, and *hspa8*<sup>hi138Tg</sup> were grown to 24 hpf and analyzed by whole mount *in situ* hybridization for the mRNA expression of the Tp53-target gene *puma*.

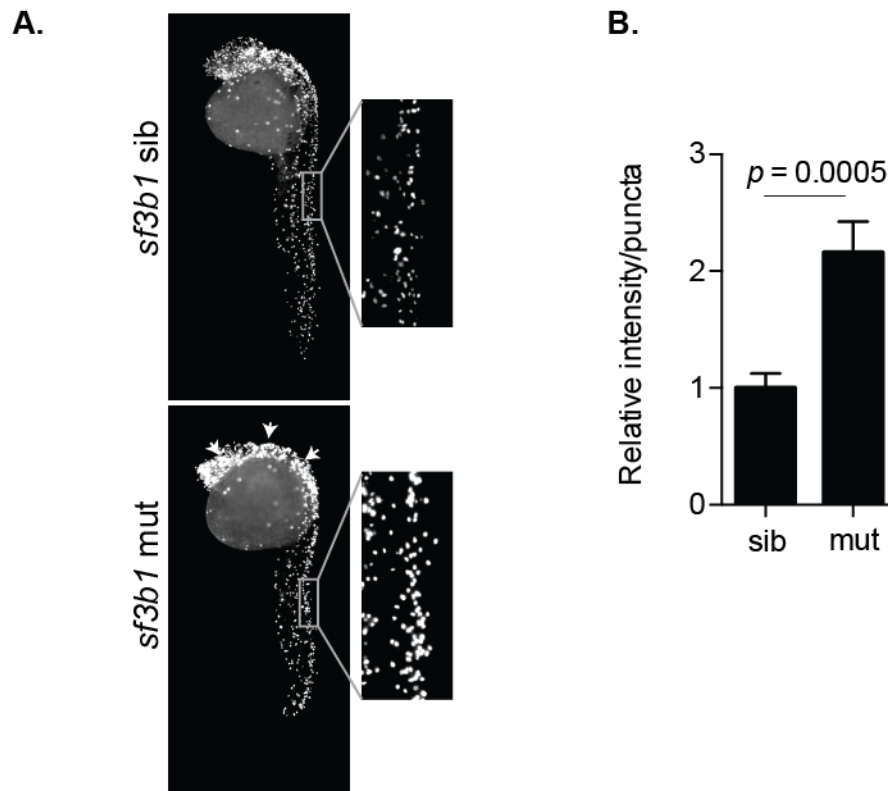

Figure S3

**Figure S3. The splicing factor mutant *sf3b1*<sup>hi3394</sup> have elevated levels of H3S10P.** (A) Embryos were analyzed at 31 hpf by whole-mount immunofluorescence to detect histone H3 phosphorylation at serine 10 (H3S10P). Arrowheads mark increased H3S10P staining in the head of the *sf3b1*<sup>hi3394aTg</sup> mutants. Magnified representative images of neural tissue highlighting differences in staining. (B) Neural tissue from the tails of *sf3b1*<sup>hi3394aTg</sup> mutants and siblings was quantified for intensity of H3S10P staining and normalized to the average number of H3S10P positive puncta per sibling control.
